# Supplementary material
Source: ML conference proceedings conference paper supplement (https://openaccess.thecvf.com/content/cvpr_2017/html/Law_Efficient_Multiple_Instance_2017_CVPR_paper.html)
Supplement: Supplementary file 1 [file Law_Efficient_Multiple_Instance_2017_CVPR_supplemental.pdf]

## A. Supplementary Material of “Efficient Multiple Instance Metric Learning using Weakly Supervised Data”

### A.1. About the reference vectors

#### A.1.1 Closed-form solution of the reference vectors $Z$

As mentioned in [34, Example 2], the problem:

$$\min_C \|A - BCD\|^2 \quad (17)$$

can be solved in closed-form:  $C = B^\dagger AD^\dagger$ .

In Eq. (4), we can write  $A = \text{diag}(H\mathbf{1})XL$ ,  $B = H$  and  $D = L$ . The matrix  $Z = H^\dagger \text{diag}(H\mathbf{1})XLL^\dagger$  is then optimal for Eq. (4).

We recall that  $H \in \mathcal{Q}^\mathcal{V}$ . We prove in the following that:  $\forall H \in \mathcal{Q}^\mathcal{V}$ ,  $H^\dagger \text{diag}(H\mathbf{1}) = H^\dagger$ .

*Proof.* For any  $H \in \mathcal{Q}^\mathcal{V}$  satisfying  $H\mathbf{1} \neq \mathbf{1}$ , there exists a permutation matrix  $P_\pi$  such that  $P_\pi H = \begin{bmatrix} \tilde{H} \\ \mathbf{0} \end{bmatrix}$  and  $\text{diag}(P_\pi H\mathbf{1}) = \text{diag}\left(\begin{bmatrix} \mathbf{1} \\ \mathbf{0} \end{bmatrix}\right)$ . Therefore,

$$\begin{aligned} H^\dagger \text{diag}(H\mathbf{1}) &= \left(P_\pi^\top \begin{bmatrix} \tilde{H} \\ \mathbf{0} \end{bmatrix}\right)^\dagger \text{diag}(H\mathbf{1}) = \left(\begin{bmatrix} \tilde{H} \\ \mathbf{0} \end{bmatrix}\right)^\dagger P_\pi \text{diag}(H\mathbf{1}) = [\tilde{H}^\dagger \quad \mathbf{0}] \text{diag}(P_\pi H\mathbf{1}) P_\pi \\ &= [\tilde{H}^\dagger \quad \mathbf{0}] \text{diag}\left(\begin{bmatrix} \mathbf{1} \\ \mathbf{0} \end{bmatrix}\right) P_\pi = [\tilde{H}^\dagger \quad \mathbf{0}] P_\pi = H^\dagger. \end{aligned}$$

On the other hand, if  $H\mathbf{1} = \mathbf{1}$ ,  $\text{diag}(H\mathbf{1})$  is the identity matrix and we then also have  $H^\dagger \text{diag}(H\mathbf{1}) = H^\dagger$ .  $\square$

It is then clear that  $\forall H \in \mathcal{Q}^\mathcal{V}$ ,  $Z = H^\dagger \text{diag}(H\mathbf{1})XLL^\dagger = H^\dagger XLL^\dagger$  is optimal for Eq. (4).

#### A.1.2 Mean vector of assigned instances

We explain why  $ZL = H^\dagger XLL^\dagger L = H^\dagger XL$  is the set of  $k$  mean vectors (*i.e.*, centroids) of the instances in  $X$  assigned to the  $k$  respective clusters and mapped by  $L$ .

By definition,  $XL$  is the set of instances in  $X$  mapped by  $L$ . We note  $\mathbf{h}_c$  the  $c$ -th column of  $H \in \mathcal{Q}^\mathcal{V}$ ,  $\forall c \in \{1, \dots, k\}$ , we can write the  $c$ -th row of  $H^\dagger = (H^\top H)^\dagger H^\top$  as  $\frac{1}{\max\{1, \mathbf{h}_c^\top \mathbf{1}\}} \mathbf{h}_c^\top$  where  $\mathbf{h}_c^\top \mathbf{1} = \|\mathbf{h}_c\|^2$  is the number of instances assigned to cluster  $c$ . The  $c$ -th row of  $ZL$  which corresponds to  $\mathbf{z}_c^\top L$  can then be written  $\mathbf{z}_c^\top L = \frac{1}{\max\{1, \mathbf{h}_c^\top \mathbf{1}\}} \mathbf{h}_c^\top XL$ . As  $\mathbf{h}_c \in \{0, 1\}^n$ ,  $\mathbf{h}_c^\top XL$  selects and sums the instances assigned to the  $c$ -th cluster and mapped by  $L$ ,  $\mathbf{z}_c^\top L = \frac{1}{\max\{1, \mathbf{h}_c^\top \mathbf{1}\}} \mathbf{h}_c^\top XL$  then computes their mean vector (*i.e.*, centroid).

Note that if for some  $c$ ,  $\mathbf{h}_c = \mathbf{0}$ , then  $(\mathbf{z}_c^\top L)^\top = \mathbf{0}$  is the closest centroid (of a candidate category) to none of the assigned instances as it would otherwise lead to  $\mathbf{h}_c \neq \mathbf{0}$  in order to minimize Eq. (4) (ignoring ties).

#### A.1.3 Equivalence between Eq. (5) and Eq. (6)

Once the closed-form expression of  $Z$  is plugged into Eq. (4), the problem can be written as:

$$\min_{H \in \mathcal{Q}^\mathcal{V}} \|\text{diag}(H\mathbf{1})XL - HH^\dagger XL\|^2 \quad (18)$$

$$= \min_{H \in \mathcal{Q}^\mathcal{V}} \text{tr}(\text{diag}(H\mathbf{1})XLL^\top X^\top \text{diag}(H\mathbf{1})) - 2 \text{tr}(\text{diag}(H\mathbf{1})XLL^\top X^\top HH^\dagger) + \text{tr}(HH^\dagger XLL^\top X^\top HH^\dagger) \quad (19)$$

$$= \min_{H \in \mathcal{Q}^\mathcal{V}} \text{tr}(XLL^\top X^\top \text{diag}(H\mathbf{1}) \text{diag}(H\mathbf{1})) - 2 \text{tr}(XLL^\top X^\top HH^\dagger \text{diag}(H\mathbf{1})) + \text{tr}(XLL^\top X^\top HH^\dagger HH^\dagger) \quad (20)$$

$$= \min_{H \in \mathcal{Q}^\mathcal{V}} \text{tr}(XLL^\top X^\top \text{diag}(H\mathbf{1})) - 2 \text{tr}(XLL^\top X^\top HH^\dagger) + \text{tr}(XLL^\top X^\top HH^\dagger) \quad (21)$$

$$\Leftrightarrow \max_{H \in \mathcal{Q}^\mathcal{V}} \text{tr}([I - \text{diag}(H\mathbf{1}) + HH^\dagger]XLL^\top X^\top) \quad (22)$$

$$= \max_{A \in \mathcal{P}^\mathcal{V}} \langle A, XMX^\top \rangle. \quad (23)$$

**All the matrices in  $\mathcal{P}^\nu$  are orthogonal projection matrices:**

The proof in Section A.1.1 implies that, for any  $H \in \mathcal{Q}^\nu$ ,  $[\text{diag}(H\mathbf{1}) - HH^\dagger]$  is an orthogonal projection matrix because:

- it is symmetric (as it is a difference of symmetric matrices).
- it is idempotent by using the proof in Section A.1.1:  $[\text{diag}(H\mathbf{1}) - HH^\dagger]^2 = \text{diag}(H\mathbf{1}) + HH^\dagger - HH^\dagger \text{diag}(H\mathbf{1}) - \text{diag}(H\mathbf{1})HH^\dagger = \text{diag}(H\mathbf{1}) + HH^\dagger - HH^\dagger - HH^\dagger = \text{diag}(H\mathbf{1}) - HH^\dagger$ . Indeed,  $\text{diag}(H\mathbf{1})HH^\dagger = ((HH^\dagger)^\top \text{diag}(H\mathbf{1})^\top)^\top = (HH^\dagger \text{diag}(H\mathbf{1}))^\top = (HH^\dagger)^\top = HH^\dagger$ .

And for all orthogonal projection matrix that is written  $P = VDV^\top$  where  $D$  is a diagonal matrix whose elements are either 0 or 1 and  $V$  is an orthogonal matrix,  $I - P = V(I - D)V^\top$  is also an orthogonal projection matrix (as  $(I - D)$  is a diagonal matrix whose elements are either 0 or 1).  $\square$

**A.2. Large margin formulation of**

Eq. (9) is equivalent to the following large margin problem:

$$\min_{M \in \mathbb{S}_+^d} \max_{C \in f_{M, \mathcal{P}^\nu}(X)} \max_{\hat{C} \in f_{M, \mathcal{P}^\mathcal{G}}(X)} \Delta(C, \hat{C}) \quad (24)$$

where  $\Delta(C, \hat{C}) = n - \langle C, \hat{C} \rangle \geq 0$  measures the *discrepancy* between the two predictions  $C$  and  $\hat{C}$ .

**A.3. Proof of Theorem 2.1**

We recall that problem (10) is written:

$$\max_{M \in \mathbb{S}_+^d} \min_{C \in f_{M, \mathcal{P}^\nu}(X)} \min_{\hat{C} \in g_M(X)} \langle C, \hat{C} \rangle \quad (25)$$

**Upper bound of Eq. (10):** Eq. (10) is naturally upper bounded by

$$\max_{M \in \mathbb{S}_+^d} \max_{C \in f_{M, \mathcal{P}^\nu}(X)} \min_{\hat{C} \in g_M(X)} \langle C, \hat{C} \rangle \quad (26)$$

By using the definition  $f_{M, \mathcal{P}^\nu}(X)$  in Eq. (7), we have  $f_{M, \mathcal{P}^\nu}(X) \subseteq \mathcal{P}^\nu$ , Eq. (26) is then upper bounded by:

$$\max_{M \in \mathbb{S}_+^d} \max_{C \in \mathcal{P}^\nu} \min_{\hat{C} \in g_M(X)} \langle C, \hat{C} \rangle = \max_{C \in \mathcal{P}^\nu} \max_{M \in \mathbb{S}_+^d} \min_{\hat{C} \in g_M(X)} \langle C, \hat{C} \rangle \quad (27)$$

Let us note  $U \in \mathbb{R}^{n \times s}$  a matrix defined as  $UU^\top = XX^\dagger$  and  $s = \text{rank}(X)$ . By using the definition of  $g_M(X)$ , the column space of  $\hat{C}$  is included in the column space of  $X$  and  $\hat{C}$  is a rank- $e$  orthogonal projection matrix where  $e = \text{rank}(XMX^\top) \leq \text{rank}(X) = s$ .  $\hat{C}$  can then be written:  $\hat{C} = UQQ^\top U^\top$  where  $Q \in \mathbb{R}^{s \times e}$  and  $U \in \mathbb{R}^{n \times s}$  are matrices with orthonormal columns.

Eq. (27) is then upper bounded by:

$$\max_{C \in \mathcal{P}^\nu} \langle C, UQQ^\top U^\top \rangle = \max_{C \in \mathcal{P}^\nu} \langle U^\top CU, QQ^\top \rangle \leq \max_{C \in \mathcal{P}^\nu} \text{tr}(U^\top CU) \quad (28)$$

Indeed, as  $Q \in \mathbb{R}^{s \times e}$  is a matrix with orthonormal columns,  $\langle U^\top CU, QQ^\top \rangle$  is upper bounded by the sum of the  $e$  largest eigenvalues of  $U^\top CU$  [21], which is itself upper bounded by  $\text{tr}(U^\top CU)$  (as it is the sum of all the eigenvalues of  $U^\top CU$  and all the eigenvalues are nonnegative since  $U^\top CU$  is symmetric PSD).

**Optimal value of Eq. (10):** Let us now assume that  $M = X^\dagger(X^\dagger)^\top$ . In this case, we have the following properties:

$$f_{M, \mathcal{P}^\nu}(X) = \arg \max_{A \in \mathcal{P}^\nu} \langle A, XMX^\top \rangle = \arg \max_{A \in \mathcal{P}^\nu} \langle A, XX^\dagger(X^\dagger)^\top X^\top \rangle = \arg \max_{A \in \mathcal{P}^\nu} \langle A, XX^\dagger \rangle = \arg \max_{A \in \mathcal{P}^\nu} \langle A, UU^\top \rangle \quad (29)$$

$$g_M(X) = \{B : B \in f_{M, \mathcal{N}}(X), \text{rank}(B) \leq \text{rank}(XX^\dagger(X^\dagger)^\top X^\top)\} = \{UU^\top\} \quad (30)$$

The objective value when  $M = X^\dagger(X^\dagger)^\top$  is then:

$$\min_{C \in f_{M, \mathcal{P}^\nu}(X)} \min_{\hat{C} \in g_M(X)} \langle C, \hat{C} \rangle = \min_{C \in \arg \max_{A \in \mathcal{P}^\nu} \langle A, UU^\top \rangle} \langle C, UU^\top \rangle = \max_{C \in \mathcal{P}^\nu} \text{tr}(U^\top CU) = \max_{A \in \mathcal{P}^\nu} \langle A, XX^\dagger \rangle \quad (31)$$

The upper bound in Eq. (28) is then obtained, which proves the optimality of the problem for this value. Eq. (11) thus finds an optimal value of  $C$  in Eq. (31) (*i.e.* a matrix  $C$  that reaches the global optimum value of Eq. (10)).  $\square$

## A.4. MIL kmeans extension

### A.4.1 Why do we optimize Eq. (12)?

We define  $U \in \mathbb{R}^{n \times s}$  as a matrix with orthonormal columns such that  $s = \text{rank}(X)$  and  $XX^\dagger = UU^\top$ .  $U$  is constructed with the ‘‘economy size’’ singular value decomposition of  $X$  and corresponds to the matrix containing the left-singular vectors of the nonzero singular values of  $X$ .

By using the results in Section A.1, the problem in Eq. (11) is equivalent to the following problems:

$$\max_{A \in \mathcal{P}^\mathcal{V}} \langle A, XX^\dagger \rangle = \max_{A \in \mathcal{P}^\mathcal{V}} \text{tr}(AXX^\dagger) = \max_{A \in \mathcal{P}^\mathcal{V}} \text{tr}(AUU^\top) = \max_{H \in \mathcal{Q}^\mathcal{V}} \text{tr}([I + HH^\dagger - \text{diag}(H\mathbf{1})]UU^\top) \quad (32)$$

$$\Leftrightarrow \min_{H \in \mathcal{Q}^\mathcal{V}} \text{tr}([\text{diag}(H\mathbf{1}) - HH^\dagger]UU^\top) = \min_{H \in \mathcal{Q}^\mathcal{V}} \text{tr}([\text{diag}(H\mathbf{1}) - HH^\dagger]UU^\top [\text{diag}(H\mathbf{1}) - HH^\dagger]^\top) \quad (33)$$

$$= \min_{H \in \mathcal{Q}^\mathcal{V}} \|\text{diag}(H\mathbf{1}) - HH^\dagger\|_F^2 \quad (34)$$

$$= \min_{H \in \mathcal{Q}^\mathcal{V}} \|\text{diag}(H\mathbf{1})U - HH^\dagger U\|^2 \quad (35)$$

$$= \min_{H \in \mathcal{Q}^\mathcal{V}, Z \in \mathbb{R}^{k \times s}} \|\text{diag}(H\mathbf{1})U - HZ\|^2 \quad (36)$$

$$= \min_{H \in \mathcal{Q}^\mathcal{V}, Z = [\mathbf{z}_1, \dots, \mathbf{z}_k]^\top \in \mathbb{R}^{k \times s}} \sum_{j=1}^n \sum_{c=1}^k H_{jc} \cdot \|\mathbf{u}_j - \mathbf{z}_c\|^2 \text{ where } \mathbf{u}_j^\top \text{ is the } j\text{-th row of } U \quad (37)$$

We then solve Eq. (12) by alternating the optimization over  $Z$  and  $H$  in Algorithm 1.

### A.4.2 Convergence of Algorithm 1

We now prove the convergence of Algorithm 1.

We note  $H^{(t)}$  and  $Z^{(t)}$  the values at iteration  $t$  of  $H \in \mathcal{Q}^\mathcal{V}$  and  $Z \in \mathbb{R}^{k \times s}$ , respectively.

- We first prove that, with Algorithm 1, the sequence of objective values in Eq. (36) (which is equal to Eq. (12)) is monotonically nonincreasing. To this end, we show that:

$$\forall t, \|\text{diag}(H^{(t)}\mathbf{1})U - H^{(t)}Z^{(t)}\|^2 \stackrel{(a)}{\geq} \|\text{diag}(H^{(t)}\mathbf{1})U - H^{(t)}Z^{(t+1)}\|^2 \stackrel{(b)}{\geq} \|\text{diag}(H^{(t+1)}\mathbf{1})U - H^{(t+1)}Z^{(t+1)}\|^2 \quad (38)$$

- Inequality (a) comes from the fact that  $Z^{(t+1)} = (H^{(t)})^\dagger \text{diag}(H^{(t)}\mathbf{1})U = (H^{(t)})^\dagger U$  is a global minimizer of  $\min_Z \|\text{diag}(H^{(t)}\mathbf{1})U - H^{(t)}Z\|^2$  as demonstrated in Section A.1.1.

- Inequality (b) comes from the fact that we can decompose the global problem as the sum of  $m$  independent subproblems (when the value of  $Z$  is fixed):

$$\min_{H \in \mathcal{Q}^\mathcal{V}} \|\text{diag}(H\mathbf{1})U - HZ^{(t+1)}\|^2 = \sum_{i=1}^m \min_{H_i \in \mathcal{V}_i} \|\text{diag}(H_i\mathbf{1})U_i - H_iZ^{(t+1)}\|^2 \quad (39)$$

As mentioned in the paper, each subproblem in Eq. (13) is solved exactly with the Hungarian algorithm. The matrix  $H^{(t+1)}$  is the concatenation into a single matrix of all the global optimum solutions of the different independent subproblems. It is then a global optimum solution of Eq. (39).

- Our clustering algorithm terminates in a finite number of steps at a partition that is locally optimal (*i.e.*, the total objective value cannot be decreased by either (a) or (b)). This result follows since the sequence of objective values in Eq. (36) is monotonically nonincreasing with Algorithm 1, and the number of distinct clusterings (*i.e.* the cardinality of  $\mathcal{P}^\mathcal{V}$ , or equivalently the cardinality of  $\mathcal{Q}^\mathcal{V}$ ) is finite.  $\square$

## A.5. Complexity of Algorithm 1

In the linear case, the complexity of steps 1 and 11 of Algo 1 is dominated by the (economy size) SVDs to compute  $U$  and  $X^\dagger$  which cost  $O(nd \min\{d, n\})$  where  $d$  is the dimensionality and  $n$  is the number of instances. The adapted kmeans costs  $O(r \sum_{i=1}^m (sp_i q_i + p_i^2 q_i))$  where  $r$  is the number of iterations (steps 3 to 8 of Algo 1). Since, in practice, we have  $\forall i, p_i = \min\{n_i, \mathbf{y}_i^\top \mathbf{1}\} \leq q_i = \max\{n_i, \mathbf{y}_i^\top \mathbf{1}\} \ll n$ , the complexity of Algo 1 is dominated by steps 1 and 11 which scale

linearly in  $n$  as we have  $n > d$ . In the nonlinear case, computing  $K^\dagger J \in \mathbb{R}^{n \times k}$  costs  $O(n^3)$ ; it is efficiently done with a Cholesky solver if  $K$  is symmetric positive definite.

In the linear case, the complexity of step 11 of Algorithm 1 does not depend on  $k$  and is dominated by the computation of  $X^\dagger$  which costs  $O(nd \min\{d, n\})$ ; this is due to the sparsity of  $H$ . Indeed, each row of  $H \in \{0, 1\}^{n \times k}$  contains at most one nonzero element.  $H$  then contains at most  $n$  nonzero elements. As explained in Footnote 1, the complexity of computing  $J$  such that  $JJ^\top = HH^\dagger$  scales linearly in  $n$  and  $J$  has the same number of nonzero elements as  $H$  (*i.e.* at most one per row). Let us note  $\nu_c$  the number of nonzero elements in the  $c$ -th column of  $J$ . Once  $X^\dagger \in \mathbb{R}^{d \times n}$  has been computed (*i.e.* the value of  $X^\dagger$  is known and fixed), computing the  $c$ -th row of  $X^\dagger J$  costs  $O(d\nu_c)$ . Computing  $L = X^\dagger J$  then costs  $O(\sum_{c=1}^k d\nu_c) = O(d \sum_{c=1}^k \nu_c)$ . As  $\sum_{c=1}^k \nu_c \leq n$ , computing  $X^\dagger J$  costs  $O(dn)$ . We actually do not need to compute  $M = LL^\top$ , computing  $L$  is sufficient and then costs  $O(nd \min\{d, n\})$  as explained in this section.

## A.6. Classification of instances in the nonlinear case

In this section, we extend the classification of test instances in the nonlinear case. To simplify the equations, we assume that the nonlinear kernel function is chosen so that  $K$  is invertible (*i.e.*,  $K^\dagger = K^{-1}$ ).

$(\cdot)_{j=1}^n$  denotes concatenation in a  $n$ -dimensional vector.

### A.6.1 Solving Eq. (15)

The squared distance of a (test) instance  $\phi(\mathbf{x}_t)$  to a centroid  $\phi(\mathbf{z}_c) = \frac{1}{\max\{1, \mathbf{h}_c^\top \mathbf{1}\}} \Phi \mathbf{h}_c$  where  $\mathbf{h}_c \in \{0, 1\}^n$  is the  $c$ -th column of  $H$  is:

$$\begin{aligned} & \|P\Phi^\top \phi(\mathbf{x}_t) - P\Phi^\top \phi(\mathbf{z}_c)\|^2 \\ &= ((\mathbf{k}(\mathbf{x}_j, \mathbf{x}_t))_{j=1}^n)^\top P^\top P (\mathbf{k}(\mathbf{x}_j, \mathbf{x}_t))_{j=1}^n + ((\mathbf{k}(\mathbf{x}_j, \mathbf{z}_c))_{j=1}^n)^\top P^\top P (\mathbf{k}(\mathbf{x}_j, \mathbf{z}_c))_{j=1}^n - 2((\mathbf{k}(\mathbf{x}_j, \mathbf{z}_c))_{j=1}^n)^\top P^\top P (\mathbf{k}(\mathbf{x}_j, \mathbf{x}_t))_{j=1}^n \end{aligned}$$

We recall that  $P = J^\top K^{-1}$  and  $J$  is defined as explained in Footnote 1, Eq. (15) is then equivalent in the nonlinear case to:

$$\arg \max_{c \in \{1, \dots, k\}} ((\mathbf{k}(\mathbf{x}_j, \mathbf{z}_c))_{j=1}^n)^\top P^\top P (\mathbf{k}(\mathbf{x}_j, \mathbf{x}_t))_{j=1}^n - \frac{1}{2} ((\mathbf{k}(\mathbf{x}_j, \mathbf{z}_c))_{j=1}^n)^\top P^\top P (\mathbf{k}(\mathbf{x}_j, \mathbf{z}_c))_{j=1}^n \quad (40)$$

The second (rescaled) term of Eq. (40) can be written:

$$((\mathbf{k}(\mathbf{x}_j, \mathbf{z}_c))_{j=1}^n)^\top P^\top P (\mathbf{k}(\mathbf{x}_j, \mathbf{z}_c))_{j=1}^n = \frac{1}{\max\{1, \mathbf{h}_c^\top \mathbf{1}\}} \mathbf{h}_c^\top \Phi^\top \Phi K^{-1} J J^\top K^{-1} \Phi^\top \Phi \left( \frac{1}{\max\{1, \mathbf{h}_c^\top \mathbf{1}\}} \mathbf{h}_c \right) \quad (41)$$

$$= \frac{1}{(\max\{1, \mathbf{h}_c^\top \mathbf{1}\})^2} \mathbf{h}_c^\top K K^{-1} J J^\top K^{-1} K \mathbf{h}_c \quad (42)$$

$$= \frac{1}{(\max\{1, \mathbf{h}_c^\top \mathbf{1}\})^2} \mathbf{h}_c^\top J J^\top \mathbf{h}_c = \frac{1}{(\max\{1, \mathbf{h}_c^\top \mathbf{1}\})^2} \mathbf{h}_c^\top H H^\dagger \mathbf{h}_c \quad (43)$$

$$= \frac{1}{(\max\{1, \mathbf{h}_c^\top \mathbf{1}\})^2} \mathbf{h}_c^\top \mathbf{h}_c \quad (44)$$

We also note that  $\|\mathbf{h}_c\|^2 = \mathbf{h}_c^\top \mathbf{h}_c = \mathbf{h}_c^\top \mathbf{1} = \sum_j H_{jc}$  is the number of instances assigned to category  $c$ . Eq. (44) is then equal to the inverse of the number of elements assigned to category  $c$  (*i.e.* the inverse of the size of cluster  $c$ ) if  $\mathbf{h}_c \neq \mathbf{0}$ , and 0 otherwise.

The first term of Eq. (40) can be written:

$$((\mathbf{k}(\mathbf{x}_j, \mathbf{z}_c))_{j=1}^n)^\top P^\top P (\mathbf{k}(\mathbf{x}_j, \mathbf{x}_t))_{j=1}^n = \frac{1}{\max\{1, \mathbf{h}_c^\top \mathbf{1}\}} \mathbf{h}_c^\top \Phi^\top \Phi K^{-1} J J^\top K^{-1} (\mathbf{k}(\mathbf{x}_j, \mathbf{x}_t))_{j=1}^n \quad (45)$$

$$= \frac{1}{\max\{1, \mathbf{h}_c^\top \mathbf{1}\}} \mathbf{h}_c^\top K K^{-1} J J^\top K^{-1} (\mathbf{k}(\mathbf{x}_j, \mathbf{x}_t))_{j=1}^n \quad (46)$$

$$= \frac{1}{\max\{1, \mathbf{h}_c^\top \mathbf{1}\}} \mathbf{h}_c^\top H H^\dagger K^{-1} (\mathbf{k}(\mathbf{x}_j, \mathbf{x}_t))_{j=1}^n \quad (47)$$

$$= \frac{1}{\max\{1, \mathbf{h}_c^\top \mathbf{1}\}} \mathbf{h}_c^\top K^{-1} (\mathbf{k}(\mathbf{x}_j, \mathbf{x}_t))_{j=1}^n \quad (48)$$

|                              |       |      |      |     |     |    |    |   |   |    |    |    |    |    |    |
|------------------------------|-------|------|------|-----|-----|----|----|---|---|----|----|----|----|----|----|
| Number of instances in a bag | 1     | 2    | 3    | 4   | 5   | 6  | 7  | 8 | 9 | 10 | 11 | 12 | 13 | 14 | 15 |
| Number of bags               | 12562 | 5109 | 1675 | 480 | 146 | 61 | 17 | 8 | 6 | 0  | 1  | 3  | 1  | 1  | 1  |

Table 5. Distribution of the number of instances per bag: 12562 bags contain one instance, 5109 bags contain 2 instances etc.

|                                       |      |       |      |      |     |    |   |   |   |   |
|---------------------------------------|------|-------|------|------|-----|----|---|---|---|---|
| Number of training categories in bags | 0    | 1     | 2    | 3    | 4   | 5  | 6 | 7 | 8 | 9 |
| Scenario (b)                          | 1384 | 16196 | 2295 | 181  | 8   | 3  | 1 | 2 | 0 | 1 |
| Scenario (c)                          | 0    | 12225 | 6247 | 1325 | 216 | 46 | 8 | 3 | 0 | 1 |

Table 6. Distribution of the number of training categories (*i.e.*, among the  $k = 5873$ ) labeled as present in the bags depending on the scenarios. 1384 bags contain 0 training category in scenario (b) as instances correspond to other persons or are not face instances. etc.

| Scenario | Evaluation      | M-C2B [29] | miSVM [1] | MILES [4] | MILBoost [36] | EM-DD [37] | Minimax MI-Kernel [10] | MinD ( <i>minmin</i> ) [5] | MinD ( <i>maxmin</i> ) | MinD ( <i>meanmin</i> ) |
|----------|-----------------|------------|-----------|-----------|---------------|------------|------------------------|----------------------------|------------------------|-------------------------|
| (b)      | Accuracy (%)    | 6.6 ± 2.2  | 4.5 ± 2.7 | 8.2 ± 2.3 | 8.8 ± 2.4     | 1.3 ± 0.5  | 5.5 ± 1.7              | 6.8 ± 2.5                  | 3.2 ± 1.5              | 5.1 ± 1.9               |
|          | Precision (%)   | 7.2 ± 2.5  | 2.3 ± 1.5 | 9.2 ± 2.7 | 9.7 ± 2.7     | 1.8 ± 0.8  | 6.2 ± 2.5              | 7.1 ± 2.4                  | 3.1 ± 1.4              | 5.5 ± 1.8               |
|          | Train. Time (s) | 2, 572     | 610       | 240       | 182           | 13, 163    | 358                    | 276                        | 259                    | 265                     |
| (c)      | Accuracy (%)    | 4.5 ± 1.8  | 3.6 ± 1.2 | 6.7 ± 2.0 | 6.9 ± 2.3     | 0.8 ± 0.2  | 4.8 ± 1.0              | 5.5 ± 1.3                  | 1.8 ± 1.0              | 3.6 ± 1.2               |
|          | Precision (%)   | 5.3 ± 1.9  | 1.5 ± 0.8 | 7.0 ± 1.2 | 7.6 ± 1.8     | 1.1 ± 0.3  | 4.6 ± 1.3              | 5.3 ± 1.3                  | 1.5 ± 0.7              | 3.4 ± 0.8               |
|          | Train. Time (s) | 2, 762     | 653       | 265       | 205           | 13, 484    | 391                    | 296                        | 281                    | 291                     |

Table 7. Performance of the different baselines on the *Labeled Yahoo! News* dataset.

## A.6.2 Solving Eq. (16)

Following Section A.6.1, Eq. (16) can be adapted in the following way:

$$\arg \max_{c \in \{1, \dots, k\}} \frac{1}{\sqrt{\max\{1, \mathbf{h}_c^\top \mathbf{1}\}}} \mathbf{h}_c^\top K^{-1} (k(\mathbf{x}_j, \mathbf{x}_t))_{j=1}^n - \frac{\alpha}{(\max\{1, \mathbf{h}_c^\top \mathbf{1}\})^2} \mathbf{h}_c^\top \mathbf{h}_c \quad (49)$$

$$\Leftrightarrow \arg \max_{c \in \{1, \dots, k\}} \mathbf{j}_c^\top K^{-1} (k(\mathbf{x}_j, \mathbf{x}_t))_{j=1}^n - \frac{\alpha}{(\max\{1, \mathbf{h}_c^\top \mathbf{1}\})^2} \mathbf{h}_c^\top \mathbf{h}_c \quad (50)$$

where  $\mathbf{j}_c = \frac{1}{\sqrt{\max\{1, \mathbf{h}_c^\top \mathbf{1}\}}} \mathbf{h}_c$  is the  $c$ -th column of  $J$  as explained in Footnote 1.

## A.7. Statistics of Labeled Yahoo News! dataset

We give some statistics of the Labeled Yahoo News! dataset in Tables 5 and 6.

## A.8. Scores of biclass MIL classifiers

Baselines results are reported in Table 7. As M-C2B [29] uses an iterative algorithm and the complexity of each of its iterations is cubic in  $d$ , we had to reduce the dimensionality to  $d = 1000$  via PCA to make it scalable.

As explained in Section 3, M-C2B [29] is not appropriate for the face recognition task as it considers that all the instances in bags that contain a given category are relevant to the category. In the case of face verification, at most one instance per bag is relevant to a given category.

## A.9. Interpretation of the results of MIMLCA on Labeled Yahoo! News

On test categories (*i.e.*, the  $\sim 50$  selected categories per split), our model actually finds the correct instance assignments of training instances with an error of 8.6% in scenario (b) and 16.2% in scenario (c); the larger the number of instances in the categories, the smaller the detection error.

## A.10. Our reimplementaion of [12]

We contacted in April 2016 the authors of [12] and asked for their code. They replied that their code was not available. Here is our reimplementaion of their method:

```

1 function [A, Z, Obj] = MIML_metric(X, Y, N, r, params)
2 % X : [N_1, N_2, ...] in R^(d x t)
3 % Y : bool valued in {0,1}^{n x m}

```

```

4 %         d: feature dimension
5 %         n : number of bags
6 %         m : number of labels
7 %         t : total number of instances
8 % N : n x 1, N(ii) is the number of instances in bag ii
9 %         for equal sized bags, N can be 1 x 1
10 % r : reduced dimension of the metric
11 % params : parameters, structure
12 %         params.iter, max outer iteration
13 %         params.inner, max inner iteration
14 %         params.TOL, tolerance
15 %
16 % A : AA' is the distance metric, A orthogonal
17 %         in R^{d x r}
18 % Z : centroids, in R^{d x m}
19 %         each class has only one centroid (as in the experiments of Rong Jin et al.)
20
21 [d, t] = size(X);
22 [n, m] = size(Y);
23
24 % convenience for equal size of bags
25 if length(N) == 1, N = repmat(N, n, 1); end
26 if nargin < 4
27     error('not enough inputs!');
28 elseif nargin == 4
29     params = [];
30 end
31 if isempty(params)
32     params.iter = 50;
33     params.inner = 20;
34     params.TOL = 1e-4;
35 end
36 max_iter = params.iter;
37 max_inner = params.inner;
38 TOL = params.TOL;
39
40 % initialize Mahalanobis metric
41 [A, ~] = qr(randn(d, r), 0);
42 % initialize the centers;
43 %         each class has one center (as in the experiments of Rong Jin et al.)
44 Z = randn(d, m);
45 % initialize Q
46 Q = zeros(n, m);
47 Obj = zeros(max_iter, 1);
48 for iter = 1:max_iter
49
50     % Optimizing Q with A and Z fixed
51     Xhat = A' * X;
52     Zhat = A' * Z;
53     Sim = Xhat' * Zhat;
54     LenX = sum(Xhat.^2, 1)'; % COL
55     LenZ = sum(Zhat.^2, 1); % ROW
56     % (squared) distance between X and Z: t x m
57     Dist = repmat(LenX,1,m) - 2*Sim + repmat(LenZ,t,1);
58
59     % find Q bag by bag
60     cum = 0;
61     for ii = 1:n
62         [~, Q(ii,:)] = min(Dist(cum+1:cum+N(ii), :), [], 1);
63         % fix the index
64         Q(ii, :) = Q(ii, :) + cum;
65         cum = cum + N(ii);
66     end
67
68     % Optimizing A with Q and Z fixed
69     % forming U by replication
70     Xsel = X(:, Q(:)); % [n n ... n]

```

```

71 Zrep = repelem(Z, 1, n); % [n n ... n]
72 U = (Xsel - Zrep) * diag(Y(:)) * (Xsel - Zrep)';
73 % forming V by Laplacian
74 V = 2 * Z * (m*eye(m) - ones(m)) * Z';
75 % generalized eigen-decomposition
76
77 %% debug
78 % Diff = A'*Xsel - repelem(A'*Z, 1, n);
79 % obj = sum(Diff.^2, 1) * Y(:);
80 %%
81 sigma = 0;
82 for ii = 1:max_inner
83     D = V - sigma*U;
84     D = (D+D') / 2;
85     [A, ~] = eigs(D, r, 'LA');
86     sigma_new = trace(A'*V*A) / (trace(A'*U*A)+eps);
87     if abs(sigma_new - sigma) <= sigma*TOL
88         break;
89     end
90     sigma = sigma_new;
91     %% debug
92     % Diff = A'*Xsel - repelem(A'*Z, 1, n);
93     % obj = sum(Diff.^2, 1) * Y(:);
94     %%
95 end
96
97 % Optimizing Z with Q and A fixed
98 Xhat = A' * Xsel;
99 Zhat = A' * Z;
100
101 % maintain some invariants
102 sumZ = sum(Zhat, 2);
103 InnerProd = Zhat' * Zhat;
104 sqNormZ = trace(InnerProd);
105 simZ = sum(InnerProd(:));
106
107 tmp = Xhat .* repmat(Y(:)', r, 1);
108 tmp = reshape(tmp, r, n, m);
109 % not to confuse with V
110 VV = squeeze(sum(tmp, 2));
111
112 %% h is not needed
113 % sqNormX = sum(Xhat.^2, 1);
114 % sqNormX = repmat(sqNormX, n, m);
115 % h = sum(sqNormX.*Y, 1);
116
117 % not to confuse with A
118 AA = sum(Y, 1);
119
120 % not to confuse with t, total number of instances
121 tfix = trace(Zhat * ((m+1)*eye(m) - ones(m)) * Zhat') / 2;
122
123 Diff = Xhat - repelem(Zhat, 1, n);
124 obj = sum(Diff.^2, 1) * Y(:);
125 for ii = 1:max_inner
126     for jj = 1:m
127         z = Zhat(:, jj);
128         u = (sumZ - z) / (m-1);
129         s = (tfix - m*sqNormZ + (m+1)*(z'*z) + simZ - 2*z'*sumZ) / (m-1);
130         a = AA(jj);
131         v = VV(:, jj);
132
133         den = s + norm(u)^2;
134         if den > 0
135             lambda = a - min(a, norm(v-a*u)/sqrt(den));
136         else
137

```

```

138         lambda = 0;
139     end
140     znew = (v-lambda*u) / (a-lambda);
141
142     Zhat(:, jj) = znew;
143
144     % update the invariants
145     simZ = simZ - 2*z'*sumZ;
146     sumZ = sumZ - z + znew;
147     sqNormZ = sqNormZ - z'*z + znew'*znew;
148     simZ = simZ + 2*znew'*sumZ;
149 end
150
151 Diff = Xhat - repelem(Zhat, 1, n);
152 obj_new = sum(Diff.^2, 1) * Y(:);
153 if abs(obj - obj_new) ≤ TOL*obj_new
154     break; % converged
155 end
156 obj = obj_new;
157 end
158
159 fprintf('iter = %d, obj = %f \n', iter, obj);
160 if iter > 1 && abs(Obj(iter-1) - obj) ≤ TOL*obj
161     break; % converged
162 end
163
164 Obj(iter) = obj;
165
166 % recover Z in full dimension
167 Z = A * Zhat;
168 end
169 Obj = Obj(1:iter);

```

## A.11. Reimplementation of [29]

The reimplementation of [29, Algorithm 1] is straightforward. We use the same variable names as in the original paper:

```

1 function [ L, tElapsed ] = robust_mil(U,A,B, max_nbiterations, epsilon)
2 best_obj = inf;
3 obj = inf;
4 tStart = tic;
5 for iter=1:max_nbiterations
6     % step 2: construct lambda
7     lambda = sum(sqrt(sum((A * U).^2,2))) / sum(sqrt(sum((B * U).^2,2)));
8     % step 3: construct D
9     D = diag(1 ./ (2 * sqrt(sum((A * U).^2,2))));
10    % step 4: construct S
11    bU = (B * U)';
12    norm_bU = sqrt(sum(bU.^2,1));
13    S = (bsxfun(@rdivide,bU,norm_bU))';
14    % we use pinv instead of the operator \ because 2*(A'*D*A) is sometimes ill-conditioned
15    U = lambda * pinv(2 * (A' * D * A)) * (B' * S);
16    old_obj = obj;
17    obj = trace(U'*A'*D*A*U) - lambda * trace(U'*B'*S);
18    if obj ≤ best_obj
19        best_obj = obj;
20        best_U = U;
21    end
22    if abs(old_obj - obj) < epsilon
23        break;
24    end
25 end
26 tElapsed = toc(tStart)
27 L = best_U;
28 end

```
